# Supplementary material
Source: PubMed Central journal article supplement (PMC5401947)
Supplement: Supporting_and_Supplemental_Legends.pdf [file Supporting_and_Supplemental_Legends.pdf]

## **Supporting Figure and Supplemental Movie Legends**

**Supporting Figure 1. PI103 inhibits EGF signaling in C3H10T1/2 cells.** Time course of the relative translocation response of the FoxO1-clover reporter in cells incubated in SFM and then exposed to SFM or EGF [2.1 nM] ± PI103 [500 nM] for 90 min. Population averages are presented ( $n = \sim 140$  cells per incubation per treatment group).

**Movie 1 (connects to Figure 1). Simultaneous tracking of FoxO1-Clover and mKate2-Erk2 in HeLa cells during exposure to EGF.** Cells were incubated in SFM plus EGF [2.1 nM], and images were collected every 2.5 min for 90 min by time-lapse epi-fluorescence microscopy (Evos FL Auto microscope). Images were registered and the background was subtracted as described in Experimental Procedures. The video playback rate is 3 frames per second.

**Movie 2 (connects to Figure 5). Simultaneous tracking of FoxO1-Clover and mKate2-Erk2 in HeLa cells during exposure to EGF and UO126.** Cells were incubated in SFM with EGF [2.1 nM] and UO126 [10  $\mu$ M], and images were collected every 2.5 min for 90 min by time-lapse epi-fluorescence microscopy (Evos FL Auto microscope). Images were registered and the background was subtracted as described in Experimental Procedures. The video playback rate is 3 frames per second.
